# Supplementary material for: In Situ Release of Ulvan from Crosslinked Ulvan/Chitosan Complex Films and Their Evaluation as Wound Dressings
Source: MDPI journal article supplement (doi:10.3390/polym14245382), 2022-12-08
Supplement: s1 [file s1]

Supplementary

# In situ Release of Ulvan from Crosslinked Ulvan/Chitosan Complex Films and Their Evaluation as Wound Dressings

Trong-Ming Don <sup>1,\*</sup>, Chen-Han Ma <sup>2</sup> and Yi-Cheng Huang <sup>2,\*</sup>

Supplementary Experimental

*Anti-oxidant activities*

*1,1-diphenyl-2-picrylhydrazyl (DPPH) scavenging activity*

Samples (250  $\mu$ L) were mixed vigorously with 250  $\mu$ L 0.2 mM DPPH methanolic solution and left to stand for 30 min at room temperature in the dark. The absorbance was measured at 517 nm using a SpectraMax 340PC384 microplate spectrophotometer. Sample substituted with ddH<sub>2</sub>O was used as a control group. The DPPH scavenging activity (%) was determined using the following equation:

$$\text{Scavenging activity (\%)} = \left(1 - \frac{\text{OD}_{517 \text{ Sample}}}{\text{OD}_{517 \text{ Control}}}\right) \times 100\%$$

*Superoxide radical scavenging activity*

Various solutions of  $\beta$ -nicotinamide adenine dinucleotide (NADH, 78  $\mu$ M), nitroblue tetrazolium (NBT, 50  $\mu$ M) and phenazinmethosulfate (PMS, 10  $\mu$ M) were prepared in the tris-HCl buffer (16 mM, pH 8.0). 200  $\mu$ L of sample solution was added sequentially with NBT, NADH and PMS solutions, each 200  $\mu$ L. After incubating the solution for 15 min at room temperature in the dark, the absorbance was measured at 560 nm using a SpectraMax 340PC384 microplate spectrophotometer. In the control, sample was substituted with ddH<sub>2</sub>O. The scavenging activity (%) was calculated by the equation given below:

$$\text{Scavenging activity (\%)} = \left(1 - \frac{\text{OD}_{560 \text{ Sample}}}{\text{OD}_{560 \text{ Control}}}\right) \times 100\%$$

*Ferrous ion chelating activity*

The reaction mixture, containing 250  $\mu$ L of sample, 5  $\mu$ L of FeCl<sub>2</sub> (2 mM) and 10  $\mu$ L of

ferrozine (5 mM), were mixed thoroughly and allowed to react for 10 min in the dark. The absorbance was measured at 562 nm using a SpectraMax 340PC384 microplate spectrophotometer. In the control, sample was substituted with ddH<sub>2</sub>O. The chelating activity (%) was calculated by the equation given below:

$$\text{Chelating activity (\%)} = \left(1 - \frac{\text{OD}_{562 \text{ Sample}}}{\text{OD}_{562 \text{ Control}}}\right) \times 100\%$$

### *Reducing power*

Samples (250 µL) were prepared in PBS (0.2 M, pH 6.6) and added with 250 µL potassium ferricyanide (1%, w/v); they were then incubated at 50 °C for 20 min. After terminating the reaction by addition of 500 µL trichloroacetic acid solution (10%, w/v), the solution was mixed with 300 µL ferric chloride (0.1%, w/v). Finally, the absorbance was measured using a SpectraMax 340PC384 microplate spectrophotometer at 700 nm.

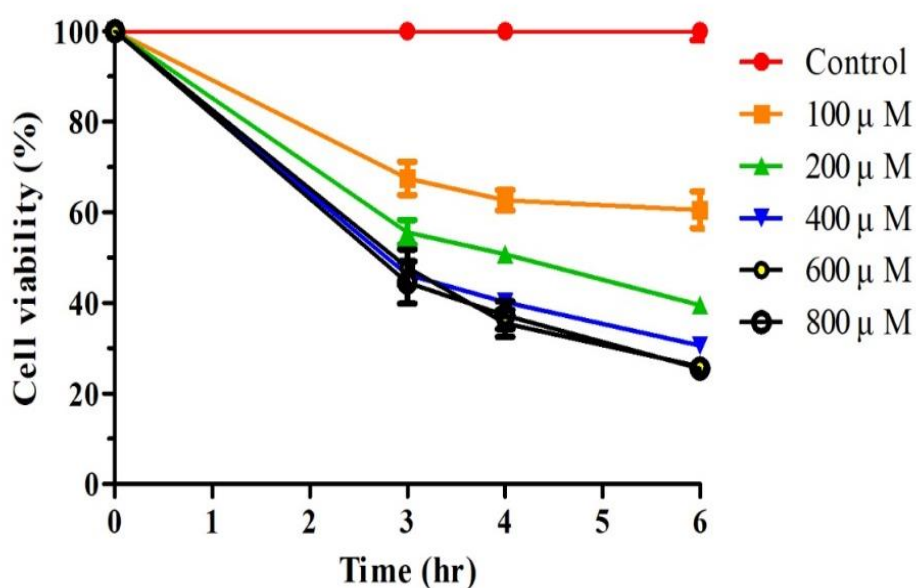

**Figure S1.** H<sub>2</sub>O<sub>2</sub> induced cytotoxicity of HaCaT cells at different times by MTT assay. Control is the medium without H<sub>2</sub>O<sub>2</sub>.

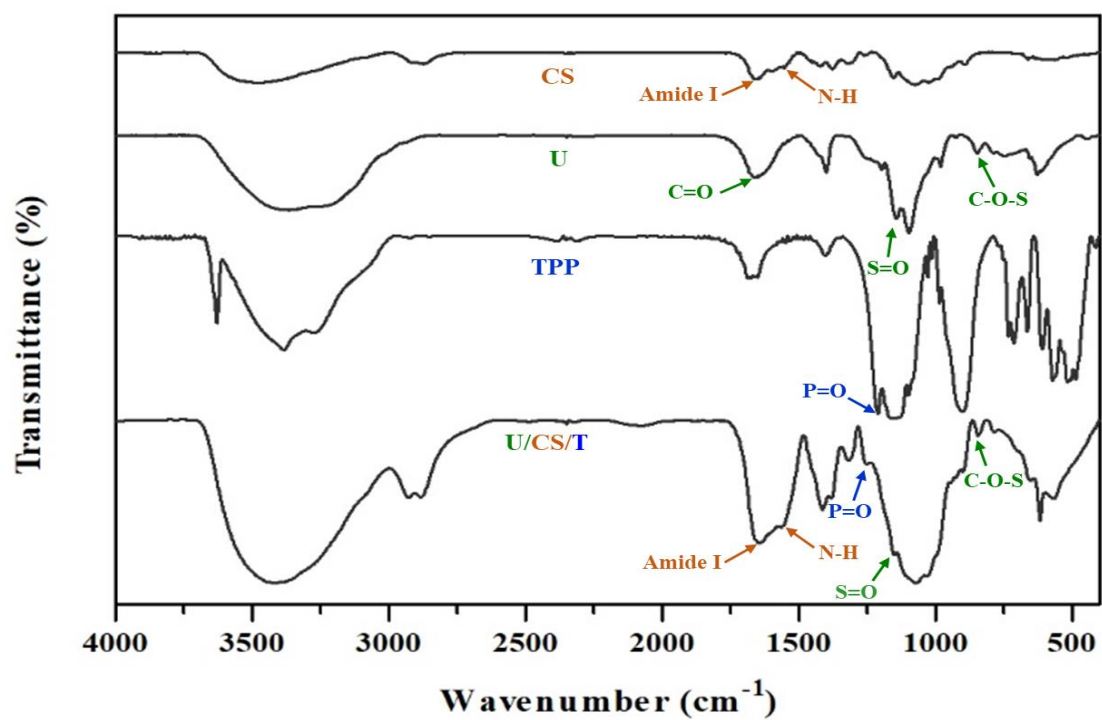

**Figure S2.** FTIR spectra of the U/CS/T film (20/75/5) and its individual components of chitosan (CS), ulvan (U), and tripolyphosphate (T).
